# Supplementary material for: Targeting Myc-driven stress vulnerability in mutant KRAS colorectal cancer
Source: PubMed Central journal article supplement (PMC8934835; doi:10.1186/s43556-022-00070-7), 2022-03-21

# Targeting Myc driven-stress vulnerability in mutant *KRAS* colorectal cancer

Hang Ruan<sup>1,2</sup>, Brian J. Leibowitz<sup>1,2</sup>, Yingpeng Peng<sup>1,2</sup>, Lin Shen,<sup>1,3,4</sup> Lujia Chen<sup>1,5</sup>, Charlie Kuang<sup>1,6</sup>, Robert E. Schoen<sup>1,6,7</sup>, Xinghua Lu<sup>1,5</sup>, Lin Zhang<sup>1,3</sup>, Jian Yu<sup>1,2\*</sup>

<sup>1</sup>UPMC Hillman Cancer Center, 5117 Centre Ave., Pittsburgh, PA 15213, USA.

<sup>2</sup>Department of Pathology, University of Pittsburgh School of Medicine, Pittsburgh, PA 15213, USA

<sup>3</sup>Department of Pharmacology and Chemical Biology, University of Pittsburgh School of Medicine, Pittsburgh, PA 15213, USA

<sup>4</sup>Department of Oncology, Xiangya Hospital, Central South University, Changsha, Hunan, 410008, P.R. China

<sup>5</sup>Department of Medical Informatics, University of Pittsburgh School of Medicine, Pittsburgh, PA 15232, USA

<sup>6</sup>Department of Medicine, University of Pittsburgh School of Medicine, Pittsburgh, PA 15213, USA.

<sup>7</sup>Department of Epidemiology, University of Pittsburgh School of Public health Pittsburgh, PA 15213, USA.

\*Correspondence:

Jian Yu, Hillman Cancer Center Research Pavilion, Suite 2.26h, 5117 Centre Ave, Pittsburgh, PA 15213. Email: [yuj2@upmc.edu](mailto:yuj2@upmc.edu)

## **Supplemental Materials and Methods**

### **Cell culture, treatment, and transfection**

For drug treatment, cells were plated in 12-well-plates at 20%-30% density 24 hours before treatment. DMSO (Sigma, St. Louis, MO, Cat#67-68-5) stocks of bortezomib (LC laboratories, Woburn, MA, Cat#179324-69-7) and everolimus (LC laboratories, Woburn, MA, Cat#159351-69-6) were prepared and diluted in cell culture media before adding to cells.

For transfection, Lipofectamine 2000 (Invitrogen, Cat#11668019) was used according to the manufacturer's instructions as [1,2]. In brief, the human eIF2AS51A construct was obtained from ADDGENE (#21808, Cambridge, MA). Cells were transfected with 0.4  $\mu$ g of Plasmids/well in 12-well-plates for 4 hr. *GCN2* small-interfering RNA (siRNA) duplexes were synthesized by Dharmacon (Lafayette, CO, USA). Cells were transfected with 200 pmols of control scrambled or specific siRNA /well in 12-well plates for 4 hours. *MYC* siRNA and *MYC* expression plasmid have been described [2]. Transfected cells after 4 hours were incubation in medium containing 5% FBS for 20 hours, replated in 10% FBS normal growth medium for 24 hours before treatment. Details for siRNA sequence and expression plasmids are found in (Table S3).

### **Patient derived CRC organoids (PDOs)**

The supplements included 1 $\times$  penicillin/streptomycin (Invitrogen ), 10 mM HEPES (Invitrogen), 2 mM GlutaMAX (Invitrogen), 1 $\times$  B27 (Invitrogen), 1 $\times$  N2 (Invitrogen), 1 mM N-Acetylcysteine (Sigma), 10 nM [leu-15]-Gastrin (Sigma), 10 mM nicotinamide (Sigma), 10  $\mu$ M SB202190 (Sigma), 50 ng/mL recombinant murine EGF (Peprotech), and 0.5  $\mu$ M A83-01 (Tocris Bioscience).

Organoids were passaged approximately 1:4 every 6–8 days with media change every 2–3 days as described [2,3]. Before treatment, organoids were digested into small clumps and seeded into 24-well or 96-well plates at appropriate density and cultured for 2 days. After treatment, cell viability was analyzed using the CellTiter-Glo® 3D Cell Viability Assay Kit (Promega, Cat#G9682) according to the manufacture's protocol. Organoids from 8 wells of each condition were pooled to prepare lysates and total RNA for western and qRT-PCR. Organoids from 16 wells of each condition were pooled, embedded in agarose gel, then fixed in 10% formalin and embedded in paraffin. H&E and immunostaining with p-eIF2a phosphorylation and cleaved-caspase 3 were performed on paraffin-embedded 5 µm sections as described [4].

### **Patient derived CRC xenografts (PDX)**

**PDX establishment.** In brief, mice were housed in a sterile environment with micro isolator cages and allowed access to water and chow ad libitum. PDX1 was established from a KRASG13D and MS stable (MSS) (T4N0M1) tumor in the sigmoid colon of a 77-year-old male (4). PDX2 (ID #172845-121T) was obtained from NCI Patient-Deprived Models Repository (PDMR, <https://pdmr.cancer.gov>), and expanded in the lab. PDX2 was established from a KRASG12D, PI3KE545K, APCN1535Mfs\*30, and MS stable adenocarcinoma in the colon of a deceased 43-year-old female after repeated therapies, including MK-2206, Selumetinib, Bevacizumab, FOLFOX, 5-Fluorouracil, Leucovorin, Indimitecan, FOLFIRI, Onalespib and Oxaliplatin.

We named first mouse passage implanted with the original human specimen as P0. ALL PDXs used were within 4 passages. For treatment experiments, we first expanded two pieces of frozen PDX stocks (~100 mm<sup>3</sup>) into NSG mice till approximately 1cm<sup>3</sup> (6-8 weeks). The expanded tumors were

harvested and divided into pieces (~100 mm<sup>3</sup>). Freshly cut pieces were immediately implanted into new NSG mice and allow to grow to palpable size in approximately 6-8 weeks prior to treatment.

Immunohistochemistry (IHC) and immunofluorescence (IF). Tumor tissues were dissected and fixed in 10% formalin and embedded in paraffin. Rehydrated sections were treated with 3% hydrogen peroxide (IHC only), followed by antigen retrieval for 10 min in boiling 0.1 M citrate buffer (pH 6.0) with 1 mM EDTA. p-eIF2a and cleaved-caspase 3 immunostaining was performed on 5 µm paraffin-embedded tumor sections as described [1,2]. Signals were detected by using AlexaFluor conjugated secondary antibody with nuclear counter staining by 4'6-Diamidino-2-phenylindole (DAPI).

### **Bioinformatics**

Volcano plots are used to visualize the overall distribution of differentially expressed genes. The threshold of differential expression genes is both  $p\text{-value} < 0.005$  and  $\log_2(\text{Fold Change}) > 1$  (i.e., 2-fold). Hierarchical clustering analysis is carried out of  $\log_{10}(\text{FPKM} + 1)$  of union differential expression genes, within all comparison groups [5]. Red denotes genes with high expression levels, and blue denotes genes with low expression levels. The color ranging from red to blue indicates  $\log_{10}(\text{FPKM} + 1)$  value from the large to small.

Gene Ontology (GO) enrichment analysis of differentially expressed genes

Gene Ontology (GO) term analysis (Gene Ontology Resource) was applied to discover biological functions of the gene set of interest. The input is the genes of interest and the output is the enriched pathways with the significant p-value ( $\leq 0.05$  or as specified). For shared or differentially expressed

genes among groups, Venn diagrams and gene lists were prepared using the function VennDiagram in R based on the gene list for different groups [6]. The display was limited to top 5 or 10 non-overlapping pathways with the most significant p-values.

### Gene Set Enrichment Analysis (GSEA)

GSEA analysis [7] was performed with Molecular Signature Database (MSigDB, v7.4) using C2 and C5 datasets as indicated [8]. In brief, the input was the RNA-seq expression data of each pair (DEG no CutOFF). In the enrichment plot, the green curve is the enrichment score (ES) curve, which is the running sum of the weighted ES obtained from the GSEA software 4.1.0 (<https://gsea-msigdb.org/gsea/msigdb/index.jsp>). The middle portion of the plot shows where the members of the gene set appear in the ranked list of genes. The bottom portion of the plot shows the value of the ranking metric as you move down the list of ranked genes. The normalized ES and the corresponding p-value are listed for all pairs as in Data deposit.

### Supplemental Tables

**Table S1. IC50s of translation-targeted agents in HCT 116 cells**

| Agent           | Targets                       | IC50       |
|-----------------|-------------------------------|------------|
| Everolimus      | mTOR/p-4EBP1 (multiple sites) | 20-25 uM   |
| Temsirolimus    | mTOR/p-4EBP1 (multiple sites) | 20-25 uM   |
| Torin 1         | mTOR/p-4EBP1 (multiple sites) | 10-15 uM   |
| Metformin       | AMPK activator, mTOR/p-4EBP1  | >100 uM    |
| Sulindac        | AMPK activator, mTOR/p-4EBP1  | 75-100 uM  |
| eFT508          | Mnk1/2, p-4E (S209)           | 30-40 uM   |
| 4EGI-1          | eIF4E-G interaction           | 15-20 uM   |
| 4Ei-1           | Cap, M7G Cap analog           | > 500 uM   |
| 17AAG           | eIF2a (43S PIC)               | 0.3-0.5 uM |
| Bortezomib      | eIF2a (43S PIC)               | 15-20 nM   |
| (Epi)silvestrol | eIF4A, helicase               | 8-10 nM    |

PIC, pre-initiation complex

**Table S2. Cell line information**

| Cell Line        | KRAS     | BRAF  | APC    | CTNNB1     | PIK3CA          | PTEN | TP53            |
|------------------|----------|-------|--------|------------|-----------------|------|-----------------|
| HCT116           | G13D/+   | WT    | WT     | S45del     | H1047R          | WT   | WT              |
| HCT116 (WT KRAS) | WT (+/-) | WT    | WT     | S45del     | H1047R          | WT   | WT              |
| HCT116 G13D?     | G13(D/-) | WT    | WT     | S45del     | H1047R          | WT   | WT              |
| SW480            | G12V     | WT    | Q1338* | WT         | WT              | WT   | R273H,<br>P309S |
| DLD-1            | G13D     | WT    | R727M  | WT         | E545K,D<br>549N | WT   | S241F           |
| DLD1 (WT KRAS)   | WT (+/-) | WT    | R727M  | WT         | E545K,D<br>549N | WT   | S241F           |
| SW48             | WT       | WT    | R2714C | S33Y       | G914R           | WT   | WT              |
| SW48/G12V (KI)   | +/G12V   | WT    | R2714C | S33Y       | G914R           | WT   | WT              |
| RKO              | WT       | V600E | WT     | WT         | H1047R          | WT   | WT              |
| DIFI             | WT       | WT    | E1151* | WT         | WT              | WT   | K132R           |
| LS180            | G12D     | D211G | R1788C | S45F       | H1047R          | I67K | WT              |
| Lim1215          | WT       | WT    | WT     | T41A,Q177P | WT              | WT   | WT              |

**Table S3. chemicals, siRNA, and other key reagents**

| Name                                                       | Vendor          | Catalog No. | Application/specifics                         |
|------------------------------------------------------------|-----------------|-------------|-----------------------------------------------|
| McCoy's 5A                                                 | Invitrogen      | 16600-082   | CRC cell culture medium                       |
| DMSO                                                       | Sigma           | 67-68-5     | solvent                                       |
| Everolimus                                                 | LC Laboratories | E-4040      | in vitro and in vivo                          |
| Bortezomib                                                 | LC Laboratories | B-1408      | in vitro and in vivo                          |
| eIF2aS51 plasmid                                           | Addgene         | #21808      | blocking p-eIF2a                              |
| GCN2 siRNA                                                 | Dharmacon       | siGCN2-1383 | CACCGTCAAGATTACGGACTA                         |
| CellTiter 96 AQueous One Solution Cell Proliferation Assay | Promega         | G3580       | Cell growth (MTS)                             |
| CellTiter-Glo® 3D Cell Viability Assay Kit                 | Promega         | G9682       | organoid growth                               |
| Crystal violet                                             | Sigma           | C0775-100G  | cell visualization                            |
| PDO culture medium with supplements                        | various         |             | PDO culture (see Ruan H et. al., Elife, 2020) |

**Table S4. Antibodies used in the study**

| ANTIGEN                    | VENDOR         | CATALOG       | APPLICATION | DILUTION     |
|----------------------------|----------------|---------------|-------------|--------------|
| 4EBP1                      | Cell Signaling | #9452S        | IB          | 1/1000       |
| 4EBP1(S65/70)              | Cell Signaling | #9451S        | IB          | 1/1000       |
| 4EBP1(T37/46)              | Cell Signaling | #2855         | IB          | 1/1000       |
| eIF2-alpha                 | Santa Cruz     | SC-11386      | IB          | 1/1000       |
| eIF2 alpha (S51)           | Cell Signaling | #3398         | IB,IF       | 1/1000,1/100 |
| Actin (Beta)               | Sigma          | A5441         | IB          | 1/1000       |
| Bim                        | Cell Signaling | #2819S        | IB          | 1/1000       |
| BiP (Grp78)                | Cell Signaling | #3177         | IB          | 1/1000       |
| CREB-2 (ATF4)              | Santa Cruz     | SC-200        | IB          | 1/1000       |
| CHOP (L63F7)               | Cell Signaling | #2895s        | IB          | 1/1000       |
| Caspase-3, cleaved         | Cell Signaling | #9661         | IB          | 1/1000       |
| Caspase-8                  | Cell Signaling | #9746         | IB          | 1/1000       |
| Caspase-9                  | Cell Signaling | #9502         | IB          | 1/1000       |
| DR5                        | Prosci         | 2019          | IB          | 1/1000       |
| GCN2                       | Abcam          | Ab137543      | IB          | 1/1000       |
| GCN2 (T899)                | Abcam          | Ab75836       | IB,IF       | 1/500,1/100  |
| KI67                       | DAKO           | M7249         | IF,IHC      | 1/100,1/100  |
| Myc                        | Abcam          | 39688         | IB          | 1/1000       |
| NOXA                       | OP180          | Sigma-Aldrich | IB          | 1/1000       |
| PERK (T981)                | Santa Cruz     | SC-32577      | IB          | 1/1000       |
| PUMA                       | PMID: 12574499 | #3795         | IB          | 1/1000       |
| S6 (S235/236)              | Cell Signaling | #2211         | IB,IF       | 1/1000,1/100 |
| Goat anti-rabbit, Alexa594 | Invitrogen     | A11012        | IF          | 1/200        |
| Goat anti-mouse , Alexa488 | Invitrogen     | A11001        | IF          | 1/200        |

**Table S5. qRT-PCR primers used (Human)**

| Gene     | Sequence                    |
|----------|-----------------------------|
| Actin-F  | GACATTAAGGAGAAGCTGTGCTATGTT |
| Actin-R  | GCCTAGAAGCATTTCGCGTGGACGA   |
| ATF4-F   | GTTCTCCAGCGACAAGGCTA        |
| ATF4-R   | GTGTCATCCAACGTGGTCAG        |
| BIM-F    | TAAGTTCTGAGTGTGACCGAGA      |
| BIM-R    | GCTCTGTCTGTAGGGAGGTAGG      |
| CHOP-F   | TGGAAATGAAGAGGAAGAATCAAAA   |
| CHOP-R   | CTTGGTGCAGATTCACCATTC       |
| DR5-F    | AAGACCCTTGTGCTCGTTGT        |
| DR5-R    | AGGTGGACACAATCCCTCTG        |
| GADD34-F | ACTCCCCTAAAGGCCAGAAA        |

|           |                                    |
|-----------|------------------------------------|
| GADD34-R  | GCTAAAGGTGGGTTCTGAG                |
| GADD45B-F | TACGAGTCGGCCAAGTTGATG              |
| GADD45B-R | GGATGAGCGTGAAGTGGATT               |
| GCN2-F    | TGGTAAACATCGGGCAAACCTC             |
| GCN2-R    | GGACCCACTCATACAACAAGA              |
| Myc-F     | TCTTGACATTCTCCTCGGTGTCCGAGGACCT    |
| Myc-R     | TACCCTCTCAACGACAGCAGCTCGCCCAACTCCT |
| NOXA-F    | ACCAAGCCGGATTTGCGATT               |
| NOXA-R    | ACTTGCACTTGTTCCCTCGTGG             |
| PUMA-F    | GCCAGATTTGTGAGACAAGAGG             |
| PUMA-R    | CAGGCACCTAATTGGGCTC                |
| XBP1-F    | CCTTGTAGTTGAGAACCAGG               |
| XBP1-R    | GGGTCCAAGTTGTCCAGAATGC             |

## Supplemental References

- [1]He K, Zheng X, Li M, Zhang L, Yu J. mTOR inhibitors induce apoptosis in colon cancer cells via CHOP-dependent DR5 induction on 4E-BP1 dephosphorylation. *Oncogene* 2016;35(2):148-57. (In Eng). DOI: 10.1038/onc.2015.79.
- [2]Ruan H, Li X, Xu X, Leibowitz BJ, Tong J, Chen L, et al. eIF4E S209 phosphorylation licenses myc- and stress-driven oncogenesis. *Elife* 2020;9. DOI: 10.7554/eLife.60151.
- [3]Leibowitz BJ, Yang L, Wei L, Buchanan ME, Rachid M, Parise RA, et al. Targeting p53-dependent stem cell loss for intestinal chemoprotection. *Sci Transl Med* 2018;10(427). DOI: 10.1126/scitranslmed.aam7610.
- [4]Wang X, Wei L, Cramer JM, Leibowitz BJ, Judge C, Epperly M, et al. Pharmacologically blocking p53-dependent apoptosis protects intestinal stem cells and mice from radiation. *Sci Rep* 2015;5:8566. DOI: 10.1038/srep08566.
- [5]Montefusco DJ, Chen L, Matmati N, Lu S, Newcomb B, Cooper GF, et al. Distinct signaling roles of ceramide species in yeast revealed through systematic perturbation and systems biology analyses. *Sci Signal* 2013;6(299):rs14. DOI: 10.1126/scisignal.2004515.
- [6]Chen H, Boutros PC. VennDiagram: a package for the generation of highly-customizable Venn and Euler diagrams in R. *BMC Bioinformatics* 2011;12:35. DOI: 10.1186/1471-2105-12-35.
- [7]Subramanian A, Tamayo P, Mootha VK, Mukherjee S, Ebert BL, Gillette MA, et al. Gene set enrichment analysis: a knowledge-based approach for interpreting genome-wide expression profiles. *Proc Natl Acad Sci U S A* 2005;102(43):15545-50. DOI: 10.1073/pnas.0506580102.
- [8]Leibowitz BJ, Zhao G, Wei L, Ruan H, Epperly M, Chen L, et al. Interferon b drives intestinal regeneration after radiation. *Sci Adv* 2021;7(41):eabi5253. DOI: 10.1126/sciadv.abi5253.



## Supplemental figure legend

**Figure S1. The BR combination induces apoptosis in mutant *KRAS* CRC cells.** Indicated mutant CRCs were treated with vehicle (untreated, Un), Bortezomib (B), Everolimus (R), or their combination (BR, 5 nM and 10  $\mu$ M) for 48 h. (a) Apoptosis was detected by flow cytometry. (b) Western blotting of indicated proteins at 24 h. The arrow indicates active form. Actin was used as the loading control.

**Figure S2. The BR combination induces metabolic suppression and prolonged ISR.** (a) Top 10 enriched pathways identified by GO in downregulated genes (1258) in HCT 116 cells at 24 h. (b) GSEA of DEGs in HCT 116 cells (BR vs. Un) (C5 dataset). Selected gene sets are shown with NES and corresponding *p*-value. (c) Cells were transfected with vector control (VC) or *EIF2AS51A* expression plasmid for 24 h, replated for 24 h, and treated by BR. qRT-PCR analysis of indicated genes at 24 h is visualized by heatmap. FC, fold change, values are normalized to vector transfected control cells (-BR as 1) for each cell line. (d) Apoptosis at 48 h was analyzed by nuclear fragmentation assay. Values are mean+s.d. (n = 3). \*\**p*<0.01 (Student's *t*-test, two tailed), VC vs. *EIF2AS51A*. (e) Apoptosis at 48 h was analyzed by flow cytometry and (f) quantitation of Annexin V+ cells.

**Figure S3. BR induces ISR hyperactivation without affecting *MYC* mRNA.** Indicated CRC cells were treated with vehicle (Un) or BR (5 nM and 10  $\mu$ M). (a) qRT-PCR analysis of *MYC* mRNA at 24 h. (b) Western blotting of indicated proteins at different times. (c) qRT-PCR analysis of *GCN2* 48 h after siRNA transfection. (d) Cells were transfected with either scrambled (Ctrl) or

GCN2 siRNA for 24 h, replated for 24 h, and treated with BR for 48 h. Apoptosis at 48 h was determined using flow cytometry. a and c, values are mean+s.d. (n = 3). \*\*\* $p < 0.001$  (Student's *t*-test, two tailed). siGCN2 vs. Ctrl.

**Figure S4. BR induces mutant *KRAS*-selective ISR hyperactivation.** CRC cells with mutant or wt*KRAS* were treated with vehicle (Un) or BR (5 nM and 10  $\mu$ M). (a) Western blotting at 24 h. (B) qRT-PCR analysis at 24 h. Values are mean+s.d. (n = 3), normalized to untreated cells (1). \*\*\*\* $p < 0.0001$  (Student's *t*-test, two tailed). Mutant vs. wt*KRAS* group. (c) Cluster analysis of BR (vs. Un) differential genes at 24 h. (d) Top 10 enriched pathways identified by GO in downregulated genes (1141), BR-treated WT vs. mutant *KRAS* HCT116 cells (fold change  $\geq 2$ ,  $p < 0.005$ ). (e) Top 10 enriched pathways identified by GO in upregulated genes (1176) in BR-treated WT *KRAS* HCT 116 cells. (f-g) Top BR DEGs (RNA-seq) in the isogenic pair visualized by heatmap. Log2FC, fold change, normalized to values in Un. mut *KRAS* (parental) HCT 116 cells (0).

**Figure S5. BR induces ISR-associated killing of CRC PDOs.**

(a) Representative images of PDOs after splitting 1: 3-5. Scale Bar = 100  $\mu$ M. (b) qRT-PCR analysis at 24 h with values normalized to un (1). N=8 (pooled). Values are mean+s.d. (n = 3). \* $p < 0.05$ , \*\* $p < 0.01$  (Student's *t*-test, two tailed). Un vs. BR. (c) Distribution of *KRAS* mutations in CRC subtypes (DFCI, Genetech, and MSKCC cohorts, n=1965) (cBioportal.org). (d) Correlation of mutant *KRAS* and OS in DFCI, Genetech, and MSKCC CRC cohorts (n= 978) (cBioportal.org). (e) Correlation of single gene expression and OS in the TCGA COAD cohort (n=270, All).

**Figure S6. BR induces ISR hyperactivation and metabolic crisis in mutant *KRAS* CRC PDXs.**

PDX bearing NSG mice were treated with vehicle, or the combination of Everolimus (oral gavage; 10 mg/kg ) and Bortezomib (i.p.; 0.5 mg/kg). (a) Treatment and analysis schedule. (b) Representative H&E staining and Ki-67 IHC of tumors on Day 17. Inserts are enlarged areas with arrows indicating well-formed glandular structures. Scale bar = 100  $\mu$ M. (c) Quantification of Ki-67+ cells as in (b) in 3 randomly chosen 400x fields. (d) Body weight of mice. (e) qRT-PCR of indicated makers in tumors on day 4. The values were normalized to Un (1). (f) Top 10 enriched pathways identified by GO in downregulated genes (522). (g) Venn diagram of upregulated genes in HCT 116 and PDX1. (h) Top 5 enriched pathways identified by GO of shared genes from (g). c, e, values are mean+s.d. (n = 3). \*\*\* $p$ <0.001, \*\* $p$ <0.01, \* $p$ <0.05 (Student's *t*-test, two tailed). Vehicle (Un) vs. BR.

Sfig.1, related to Fig 1

**a**

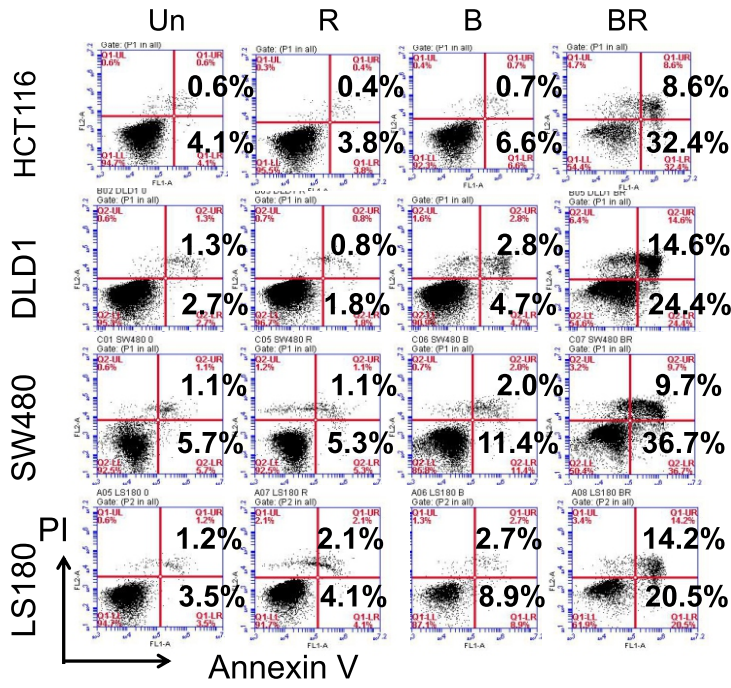

**b**

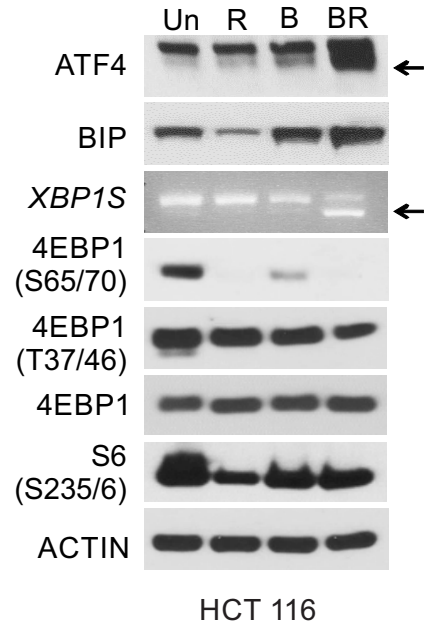

Sfig.2, related to Fig. 2

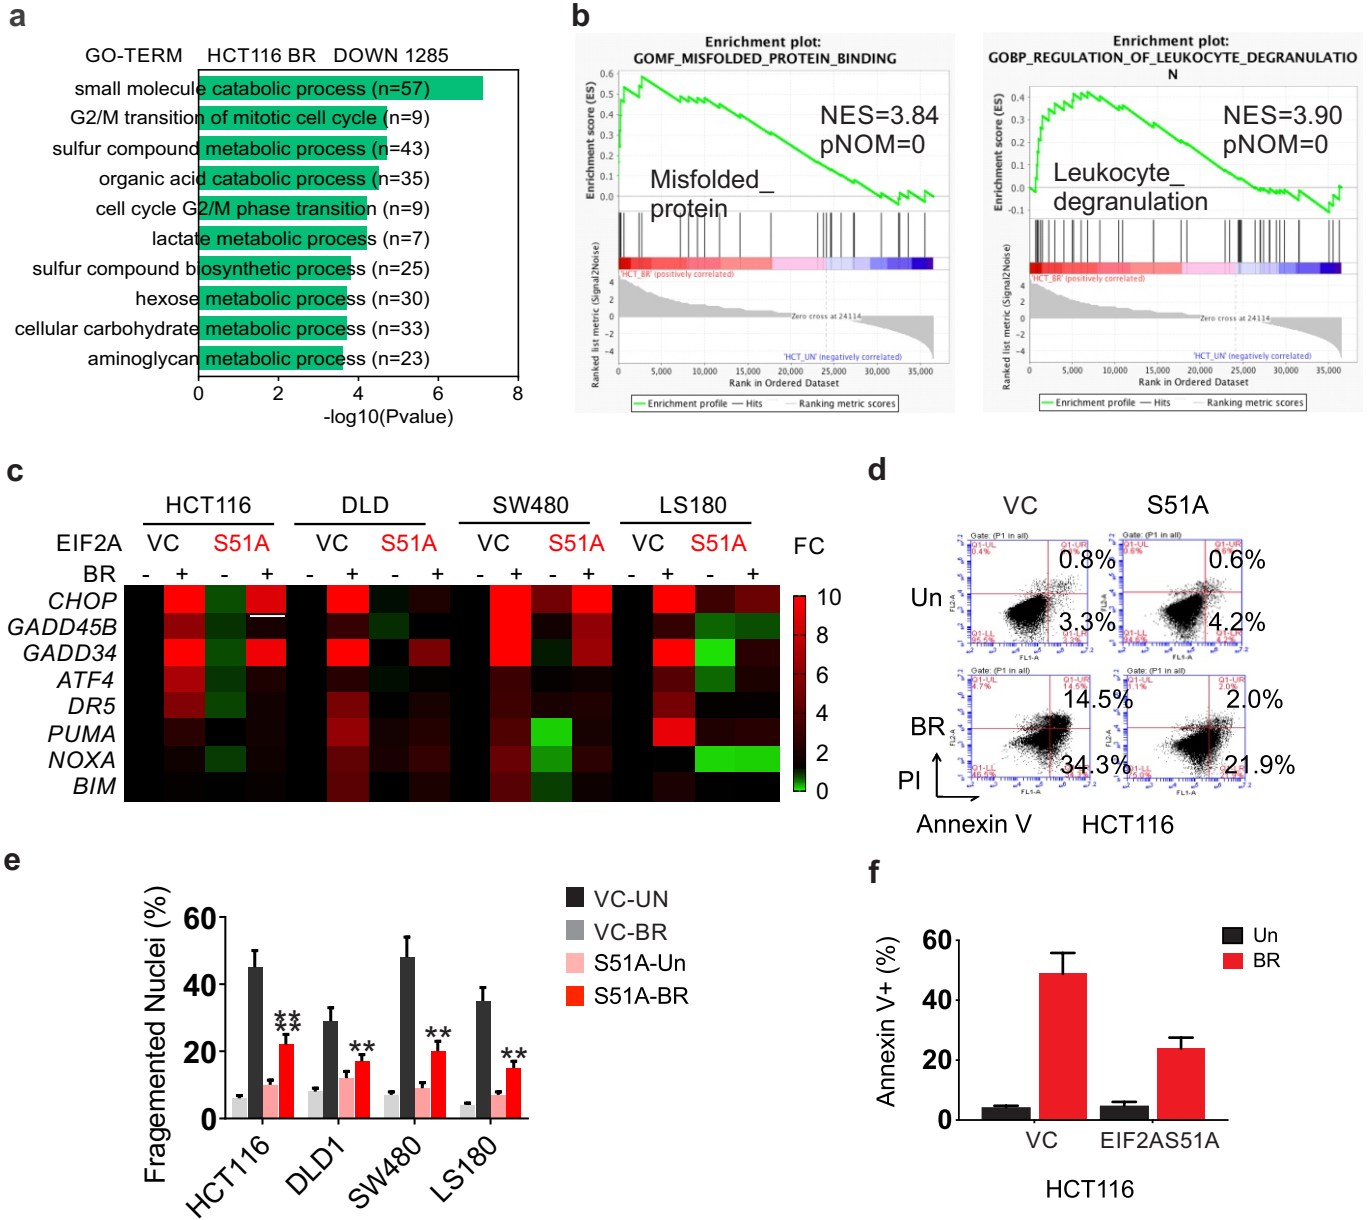

Sfig.3, related to Fig. 3

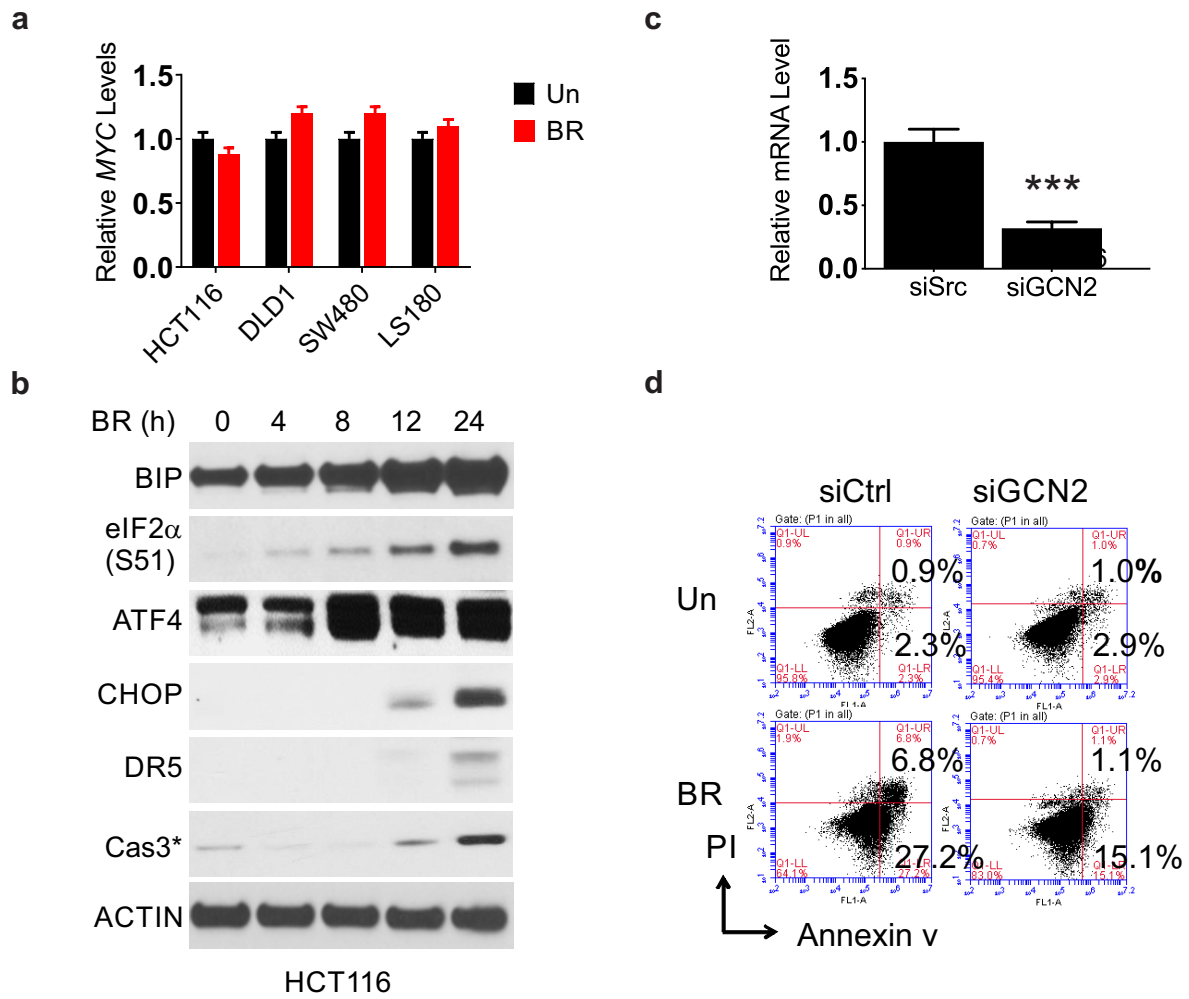

Sfig.4, related to Fig. 4

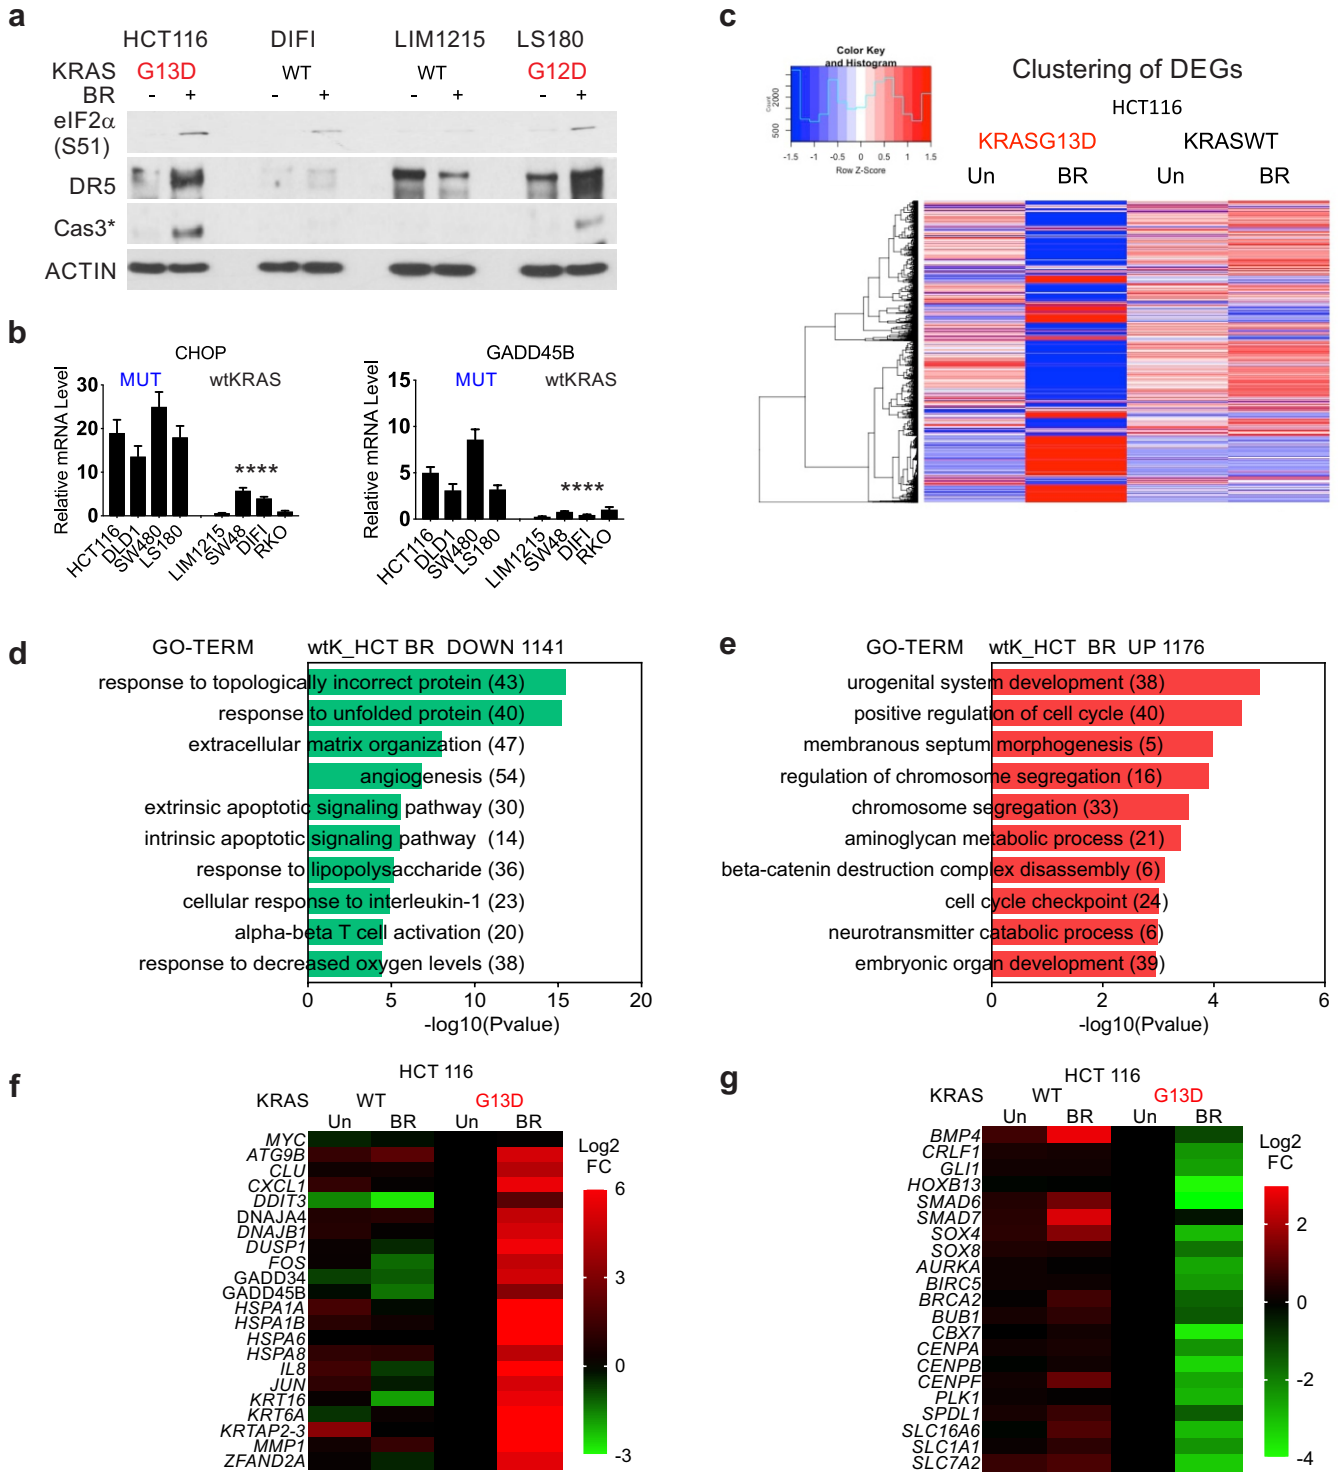

Sfig. 5, related to Fig.5

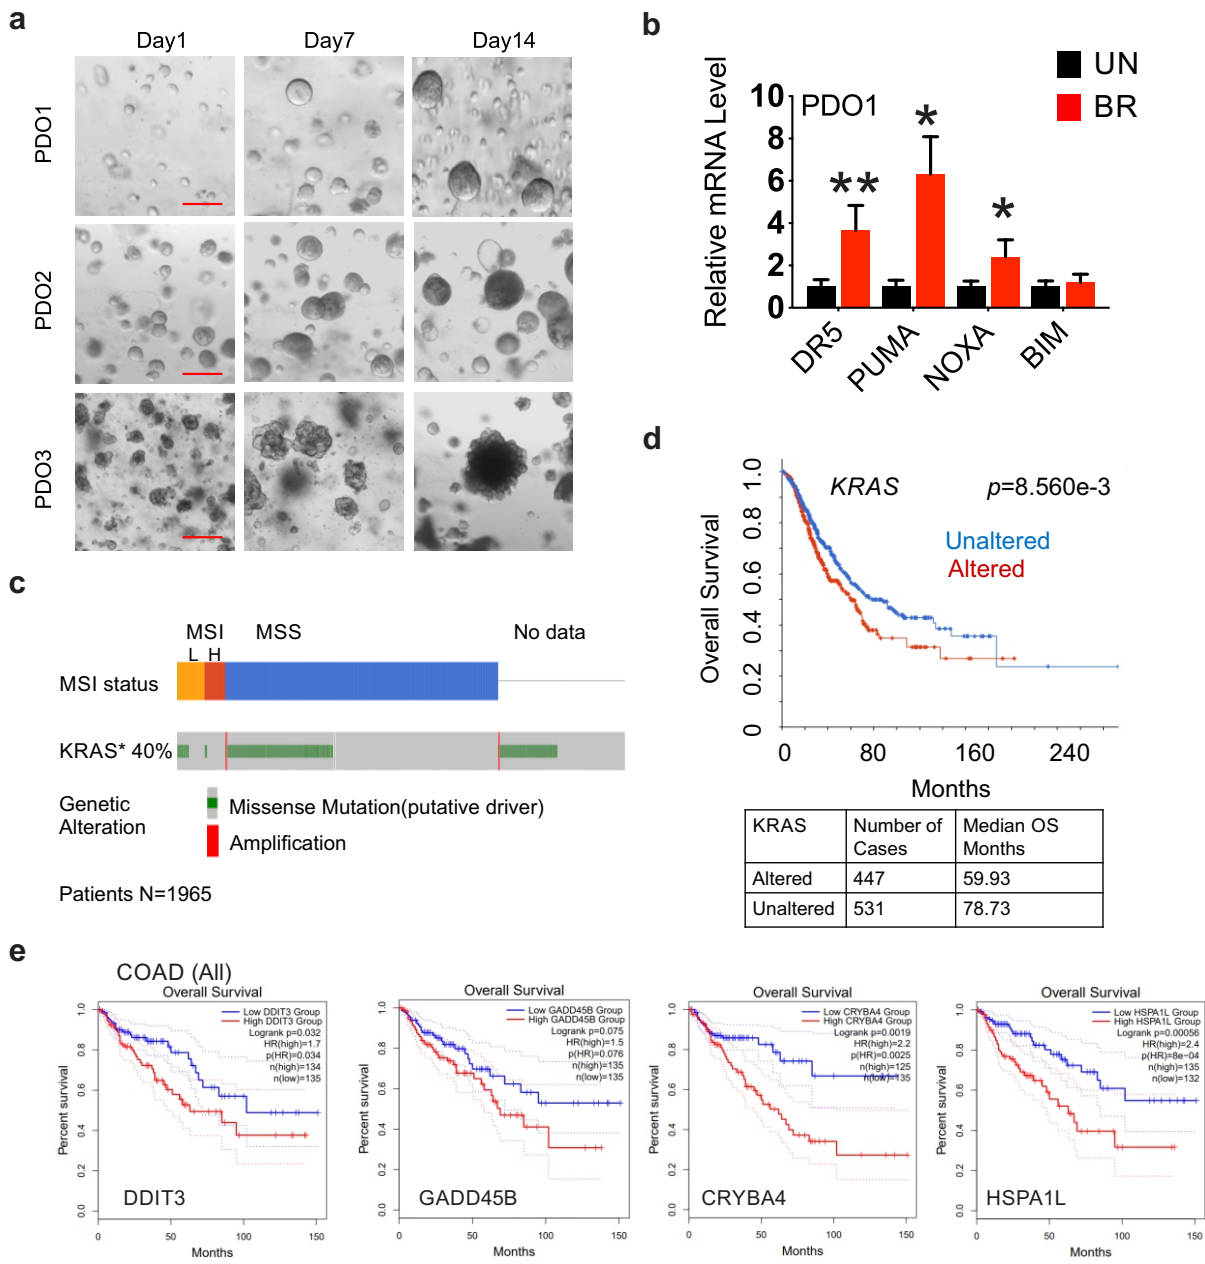



Sfig.6, related to Fig. 6

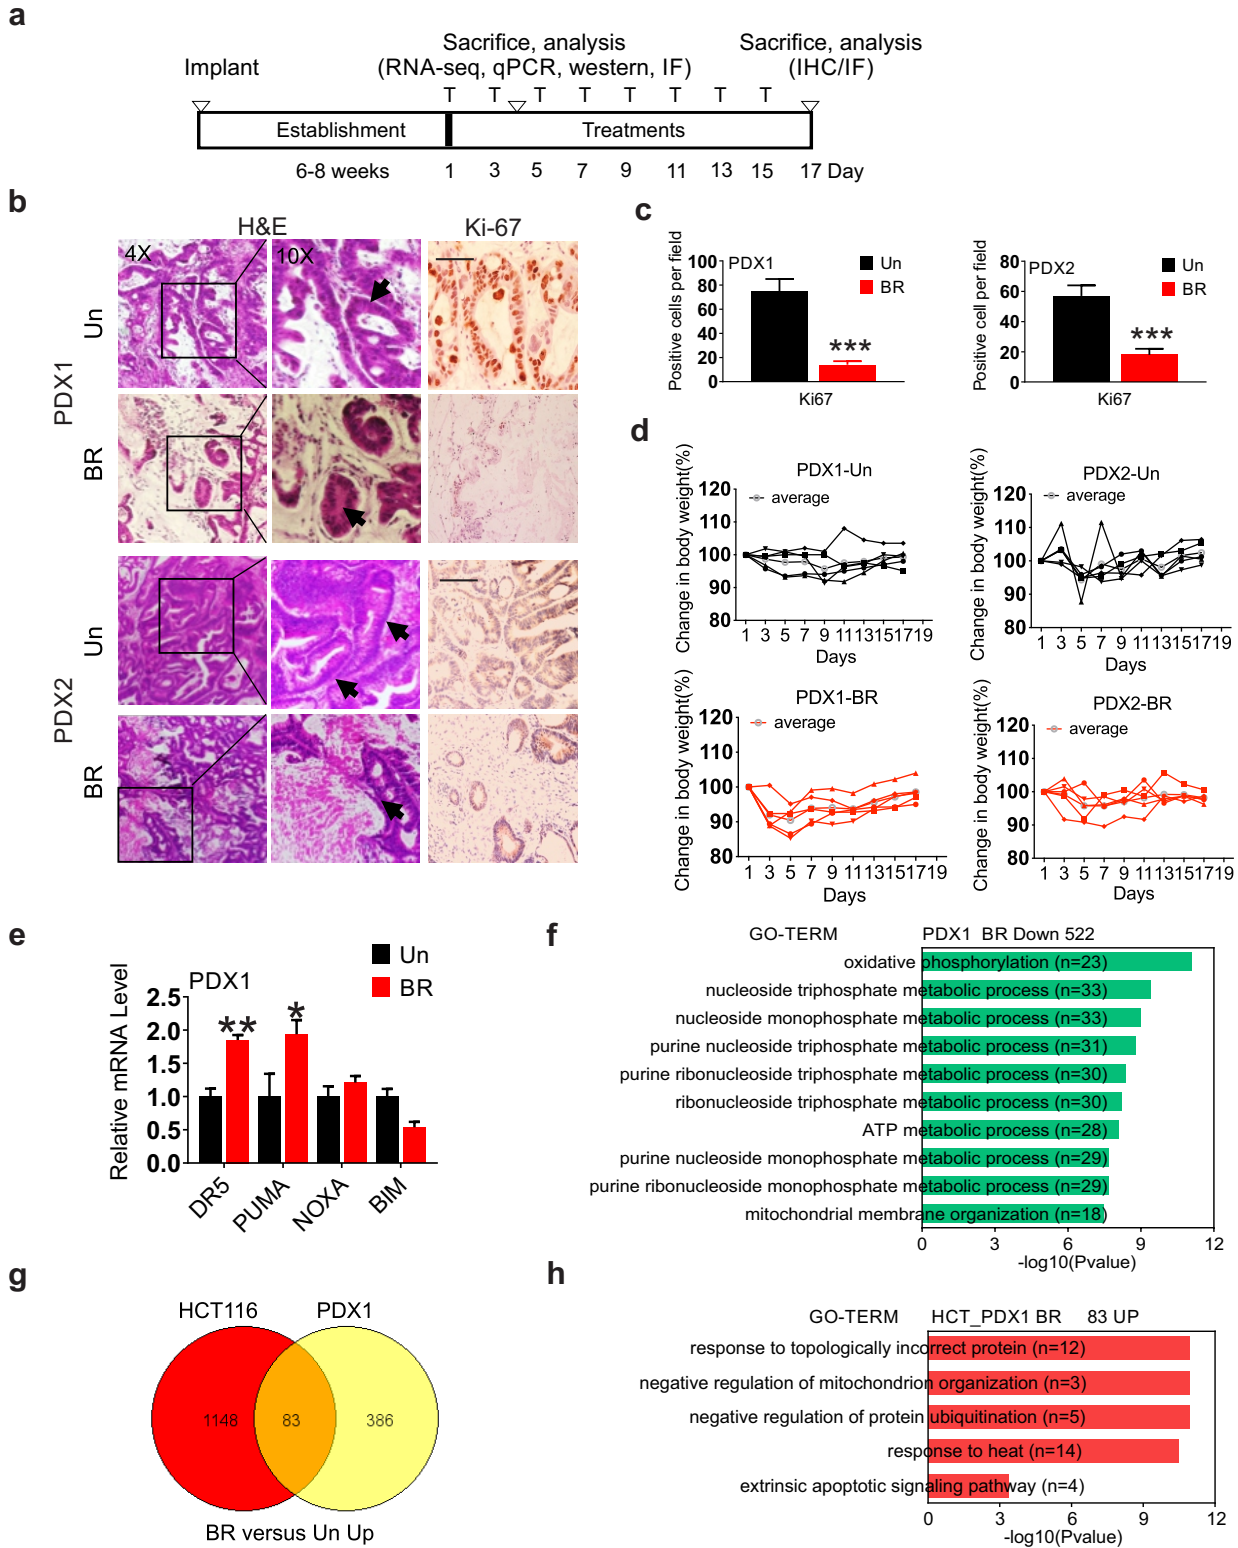

Supplement: 43556_2022_70_MOESM1_ESM.pdf [file 43556_2022_70_MOESM1_ESM.pdf]
